# Supplementary material for: Sir2-Independent Life Span Extension by Calorie Restriction in Yeast
Source: PubMed Central journal article supplement (PMC514491; doi:10.1371/journal.pbio.0020296), 2004-08-24

This file contains p-value matrices for each figure in Kaerberlein, Kirkland, Fields, and Kennedy. PLOS 2004. Each matrix contains the Wilcoxon Rank-Sum p-values for a 2-tailed test in which the life span data for the strain in the corresponding row is compared against the life span data for the strain in the corresponding column. Significant p-values ( $p < .05$ ) are colored yellow. P-values were calculated using the MATLAB ranksum function.

**FIGURE 1B**

|        | BY4742 | fob1     | gpa2     | gpr1     | hxx2     |
|--------|--------|----------|----------|----------|----------|
| BY4742 |        |          |          |          |          |
| fob1   |        | 6.33E-14 | 1.49E-04 | 1.55E-03 | 4.11E-08 |
| gpa2   |        |          | 1.84E-01 | 1.45E-01 | 2.88E-01 |
| gpr1   |        |          |          | 8.17E-01 | 6.73E-01 |
| hxx2   |        |          |          |          | 4.73E-01 |

**FIGURE 1C**

|           | BY4742 | fob1     | hxx2     | fob1 hxx2 |
|-----------|--------|----------|----------|-----------|
| BY4742    |        |          |          |           |
| fob1      |        | 2.44E-15 | 5.69E-09 | 0.00E+00  |
| hxx2      |        |          | 2.88E-01 | 6.54E-06  |
| fob1 hxx2 |        |          |          | 3.68E-06  |

**FIGURE 1D**

|           | BY4742 | fob1     | gpa2     | fob1 gpa2 |
|-----------|--------|----------|----------|-----------|
| BY4742    |        |          |          |           |
| fob1      |        | 6.57E-14 | 3.02E-04 | 1.24E-14  |
| gpa2      |        |          | 1.84E-01 | 2.16E-07  |
| fob1 gpa2 |        |          |          | 3.41E-06  |

**FIGURE 2A**

|           | BY4742 | sir2     | hxx2 sir2 | gpa2 sir2 |
|-----------|--------|----------|-----------|-----------|
| BY4742    |        | 4.37E-26 | 2.02E-14  | 1.34E-18  |
| sir2      |        |          | 1.63E-02  | 1.15E-04  |
| hxx2 sir2 |        |          |           | 3.87E-01  |
| gpa2 sir2 |        |          |           |           |

**FIGURE 2B**

|           | BY4742 | sir2     | sir2 fob1 |
|-----------|--------|----------|-----------|
| BY4742    |        | 1.95E-28 | 4.28E-02  |
| sir2      |        |          | 3.96E-25  |
| sir2 fob1 |        |          |           |

**FIGURE 2C**

|                | BY4742 | sir2 fob1 | sir2 fob1 hxx2 |
|----------------|--------|-----------|----------------|
| BY4742         |        | 1.52E-02  | 1.43E-12       |
| sir2 fob1      |        |           | 6.02E-09       |
| sir2 fob1 hxx2 |        |           |                |

**FIGURE 2D**

|                | BY4742 | sir2 fob1 | sir2 fob1 gpa2 |
|----------------|--------|-----------|----------------|
| BY4742         |        | 1.52E-02  | 3.35E-13       |
| sir2 fob1      |        |           | 9.53E-11       |
| sir2 fob1 gpa2 |        |           |                |

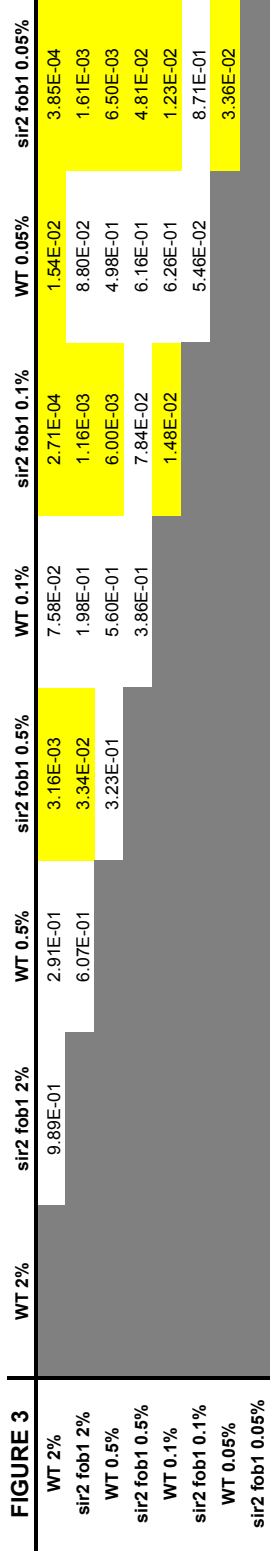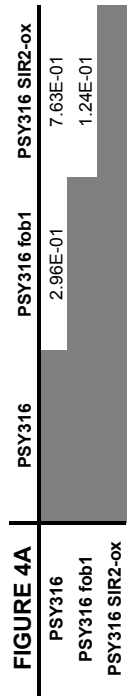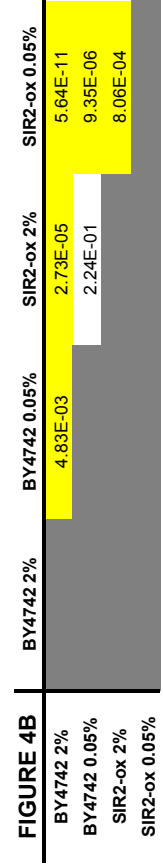

Supplement: pbio.0020296.sd001.pdf [file pbio.0020296.sd001.pdf]
